# Supplementary material
Source: PubMed Central journal article supplement (PMC4801944)
Supplement: EMBJ-35-685-s001.pdf [file EMBJ-35-685-s001.pdf]

## Expanded View Figures

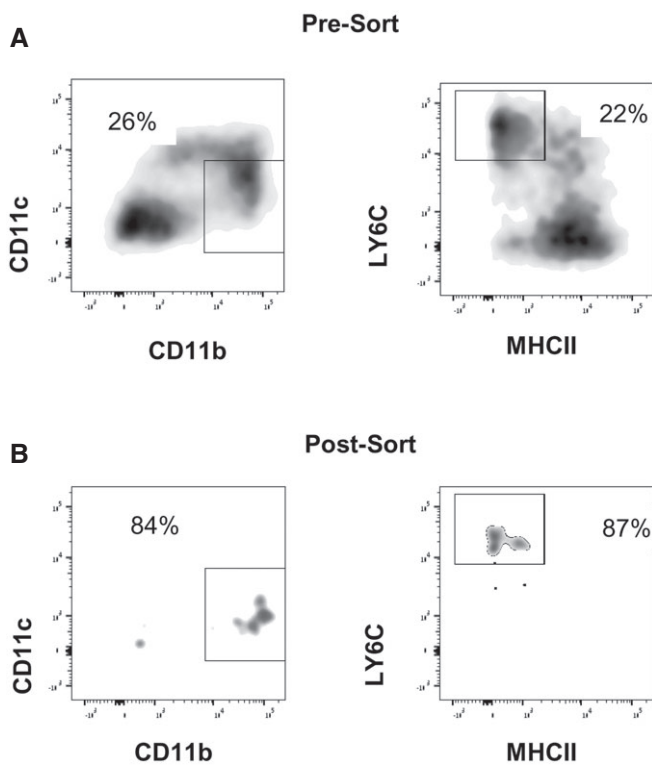

**Figure EV1. Flow cytometry sorting strategy of colonic lamina propria pro-inflammatory monocytes.**

A, B Flow cytometry analysis of colonic lamina propria CD11b<sup>+</sup>Ly6C<sup>hi</sup> monocytes (A) pre-sort and (B) post-sort.
